# Supplementary material for: Comparative Usability Study of a Novel Auto-Injector and an Intranasal System for Naloxone Delivery
Source: PubMed Central journal article supplement — Pain Ther. 2015 Apr 25;4(1):89–105. doi: 10.1007/s40122-015-0035-9 (PMC4470965; doi:10.1007/s40122-015-0035-9), 2015-04-25
Supplement: 40122_2015_35_MOESM1_ESM.pdf [file 40122_2015_35_MOESM1_ESM.pdf]

- This study compared the usability of two naloxone delivery devices, a naloxone auto-injector (NAI) and a naloxone intranasal delivery system (NXN), in the administration of naloxone during a simulated opioid overdose emergency.
- NAI (EVZIO®; kaleo, Inc., Richmond, VA, USA) is a US Food and Drug Administration approved single-use pre-filled auto-injector containing 0.4 mg/0.4 mL naloxone hydrochloride solution.
- This single-site, randomized, open-label study enrolled 42 healthy participants between 18 and 65 years of age for a within-subjects comparison test of two naloxone delivery devices.
- The primary endpoint was successful administration of a simulated dose of naloxone into a mannequin during a simulated opioid emergency, both before and after receiving training.
- The proportion of participants able to successfully administer a simulated dose of naloxone was significantly greater for NAI compared to NXN both before (90.5% vs. 0.0%, respectively,  $P < 0.0001$ ) and after (100% vs. 57.1%, respectively,  $P < 0.0001$ ) participant training.

This summary slide represents the opinions of the authors. Funding for this study was provided by kaleo, Inc. Editorial assistance in the preparation of this manuscript was provided by Sandra J. Saouaf, PhD of Science Answers, LLC and Mark Elzey, MD, and was funded by kaleo, Inc. For a full list of acknowledgments and conflicts of interest for all authors of this article, please see the full text online. Copyright © The Author(s) 2015. Creative Commons Attribution Noncommercial License (CC BY-NC).
